# Supplementary material for: Features and advantages of flexible silicon nanowires for SERS applications
Source: publisher site journal article supplement (doi:10.3762/bjnano.10.72), 2019-03-15
Supplement: Additional file 1 [file 2190-4286-10-72-S1.pdf]

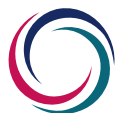

## Supporting Information

for

### **Features and advantages of flexible silicon nanowires for SERS applications**

Hrvoje Gebavi, Vlatko Gašparić, Dubravko Risović, Nikola Baran, Paweł Henryk Albrycht and Mile Ivanda

*Beilstein J. Nanotechnol.* **2019**, *10*, 725–734. [doi:10.3762/bjnano.10.72](https://doi.org/10.3762/bjnano.10.72)

### **Additional experimental data**

## Dependence of SERS intensity on the VLS process temperature

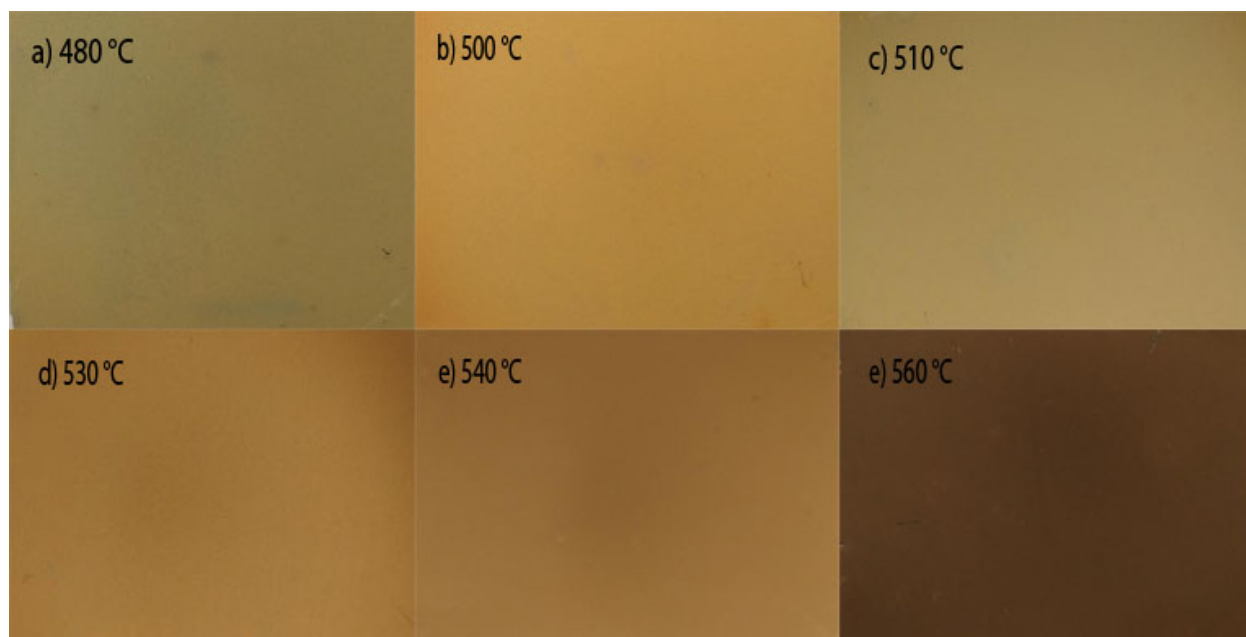

**Figure S1:** SiNWs color change with VLS temperature.

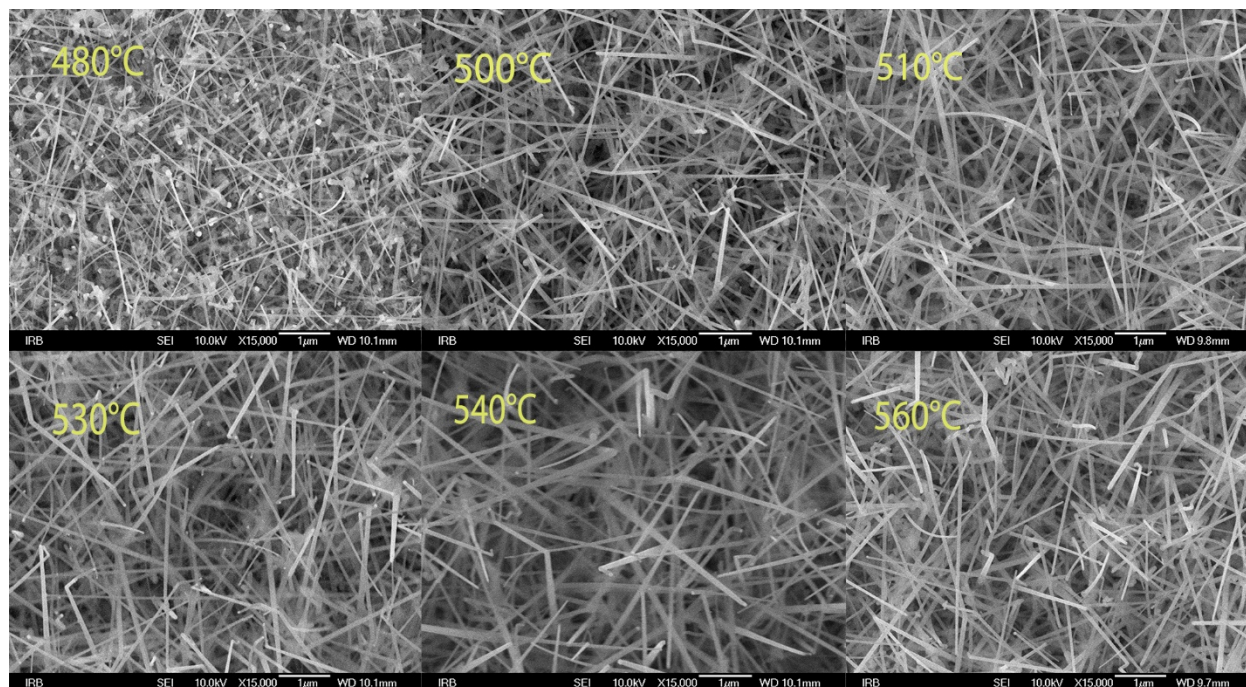

**Figure S2:** SEM images of SiNWs obtained for various VLS temperatures (corresponding to Figure S1).

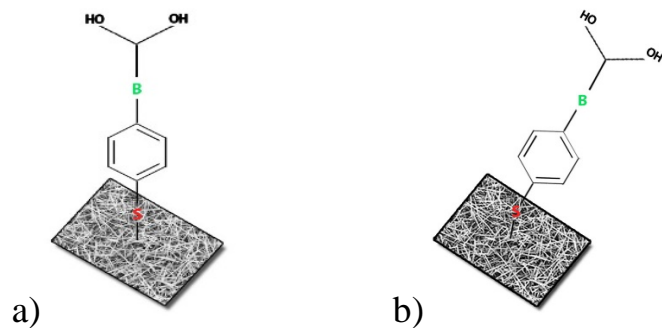

**Figure S3:** a) 4-MPBA molecule attached to the Ag-decorated SiNWs through the thiol group. b) 4-MPBA tilts at acidic pH values.

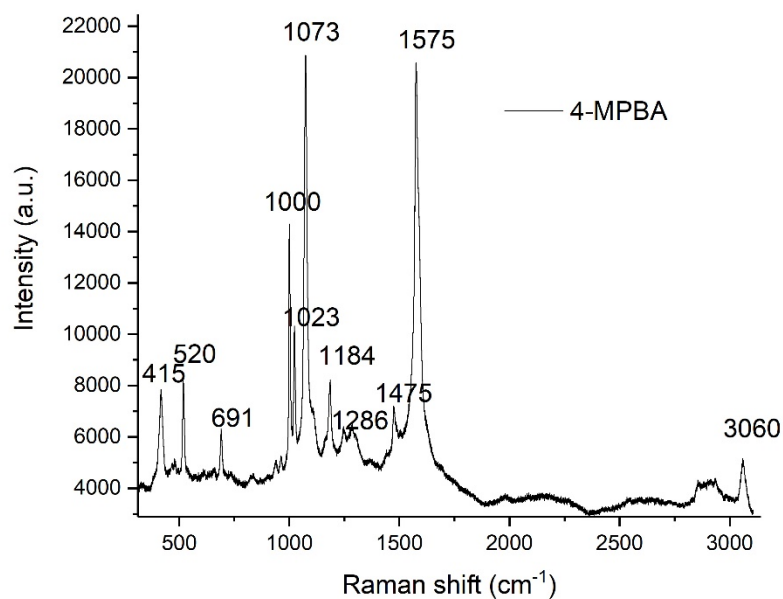

**Figure S4:** SERS spectrum of 10<sup>-4</sup> M 4-MPBA.

**Table S1:** 4-MPBA molecule band assignments.

| Observed peak position | Tentative Assignment                                 | Reference |
|------------------------|------------------------------------------------------|-----------|
| 415 cm <sup>-1</sup>   | 7a + $\nu_{CS}$                                      | [1]       |
| 520 cm <sup>-1</sup>   | Si phonon                                            | [2]       |
| 691 cm <sup>-1</sup>   | $\beta_{CH} + \nu_{CS}$                              | [3]       |
|                        | -in plane bending of the C-C ring and C-S stretching | [4]       |
| 1000 cm <sup>-1</sup>  | $-\beta_{CCC}$                                       | [3]       |
|                        | -B-O-H deformation vibration                         | [5]       |
|                        | -in plane bending of the C-C ring                    | [4]       |
| 1023 cm <sup>-1</sup>  | $\beta_{CH}$ in plane bending                        | [3]       |
| 1073 cm <sup>-1</sup>  | ring C-C bending and C-S stretching                  | [4,6]     |
| 1184 cm <sup>-1</sup>  | $\nu_9 (a_1)$                                        | [7]       |
| 1286 cm <sup>-1</sup>  | in-plane bending vibration of B-OH                   | [8]       |
| 1475 cm <sup>-1</sup>  | C-C stretching                                       | [4]       |
| 1575 cm <sup>-1</sup>  | ring C-C stretching nontotally symmetric 8b mode     | [3-6]     |
| 3060 cm <sup>-1</sup>  | C-H stretching <sup>a</sup>                          | [9]       |

<sup>a</sup>A weak C-H stretching band at 3060 cm<sup>-1</sup> might be associated with a flat orientation of the benzoic ring while a more intense band hints at different orientations [9].

# Ag decoration and morphology of Si nanowires and immersion-induced changes

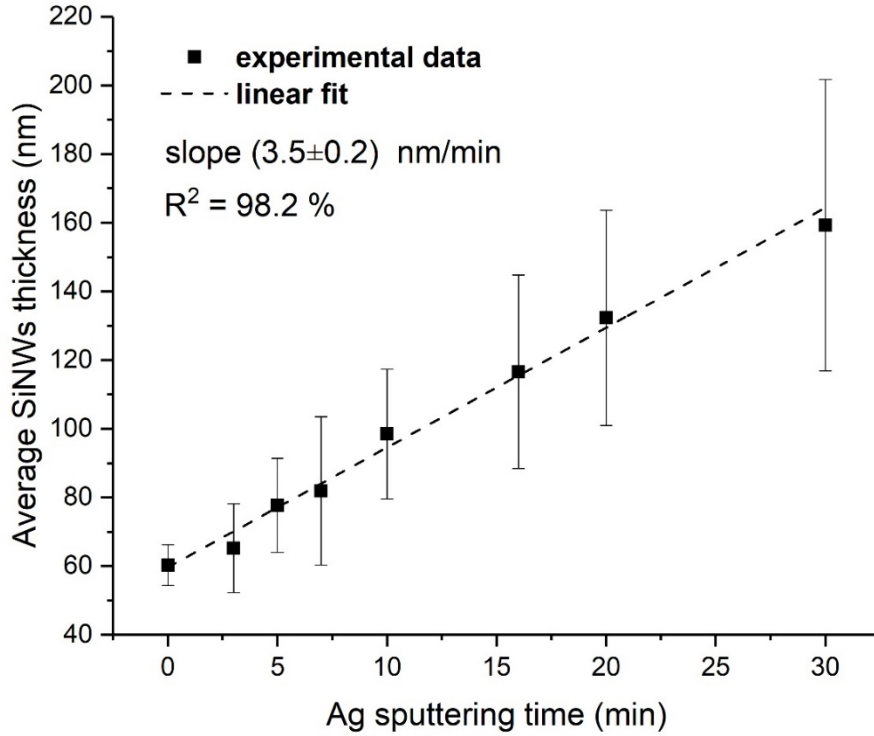

**Figure S5:** Average SiNW thickness values as a function of the sputtering time.

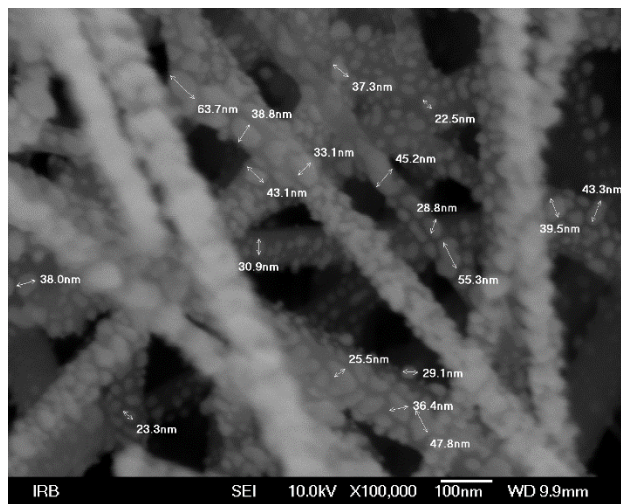

**Figure S6:** SEM image after 3 min of Ag sputtering. Grain sizes: 20–60 nm.

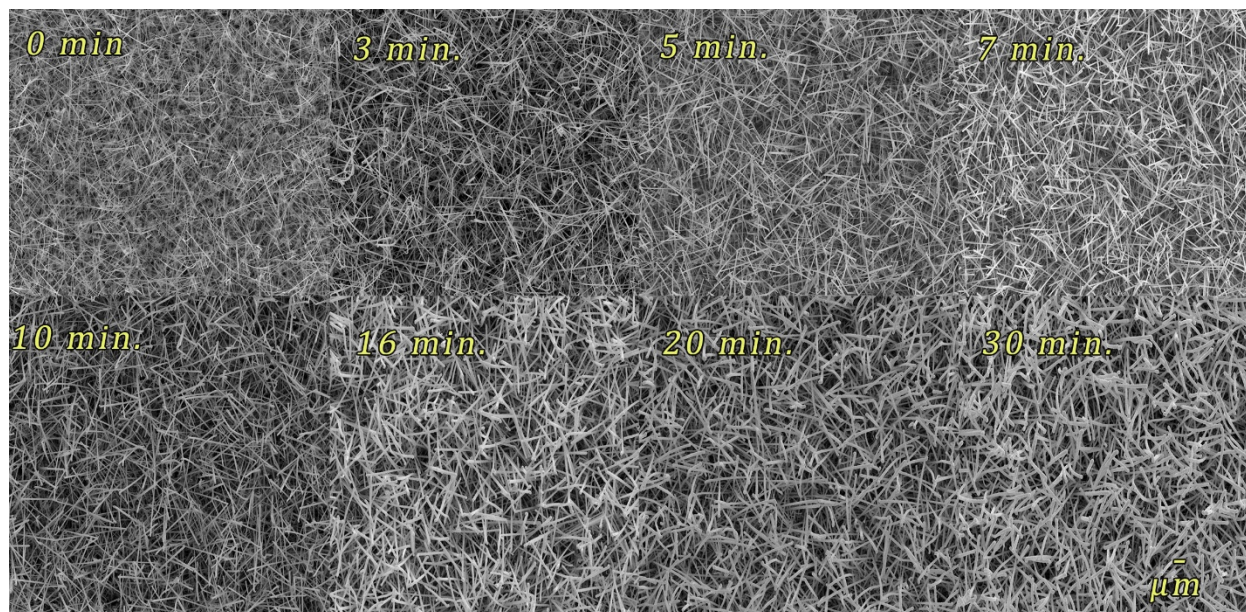

**Figure S7:** SEM images of dry samples: SiNWs obtained at 500 °C by VLS deposition. Ag sputtering time: 3–30 min.

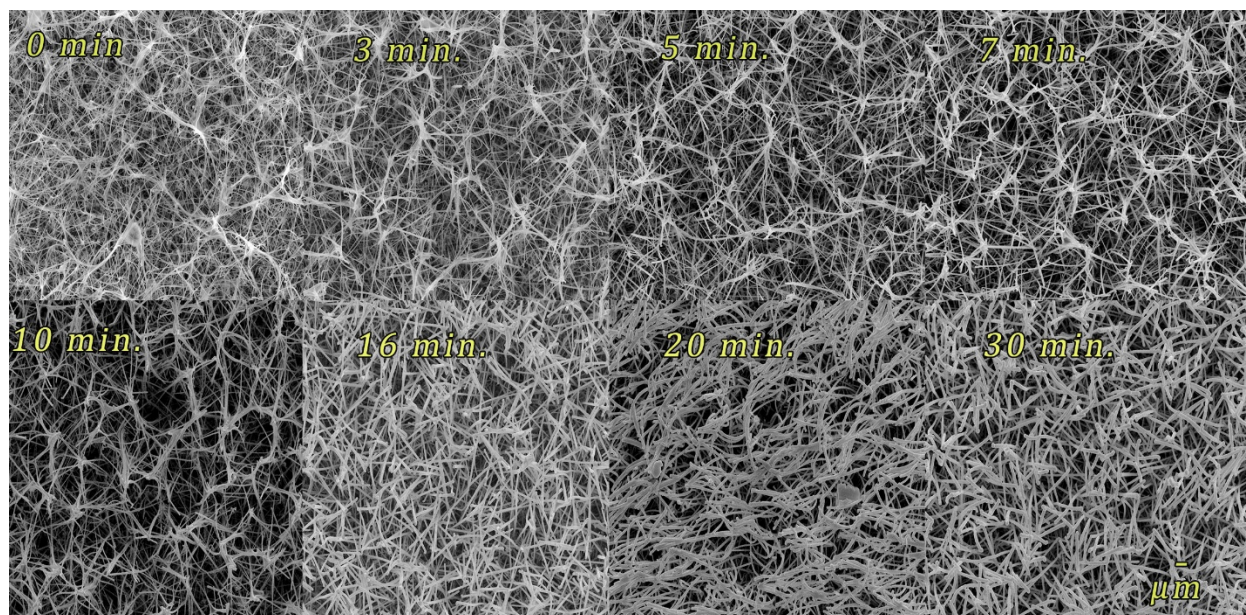

**Figure S8:** SEM images of samples after dipping in EtOH: SiNWs obtained at 500 °C by VLS deposition. Ag sputtering time: 3–30 min.

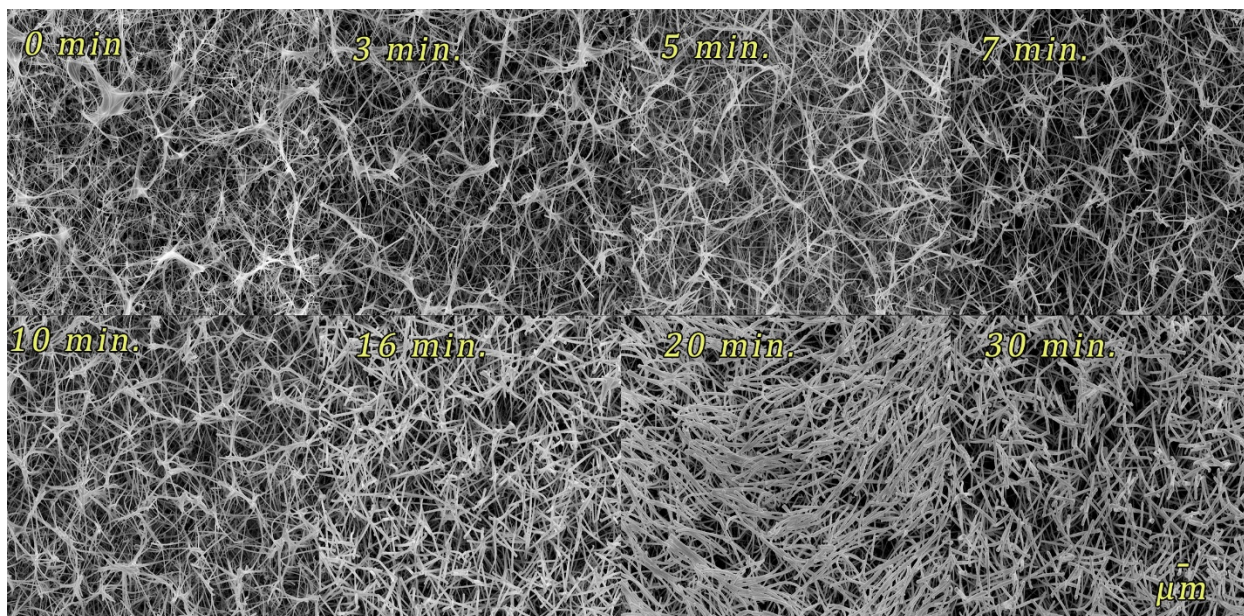

**Figure S9:** SEM images of samples after dipping in H<sub>2</sub>O: SiNWs obtained at 500 °C by VLS deposition. Ag sputtering time: 3–30 min.

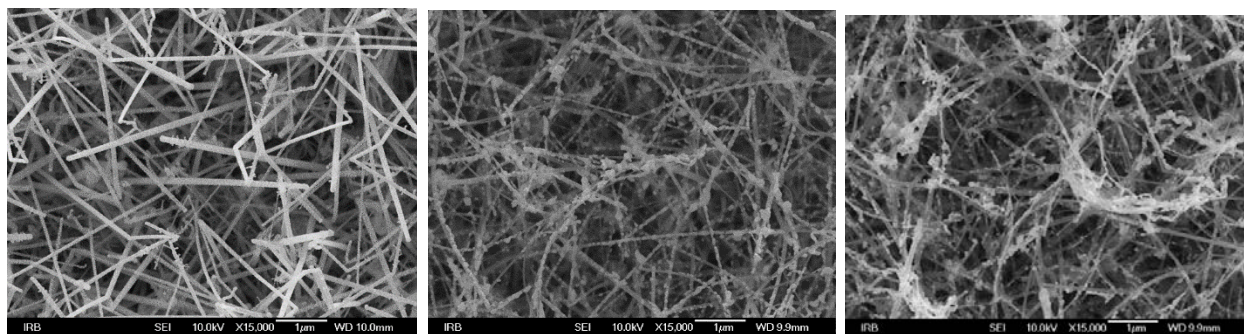

**Figure S10:** Comparison of samples: a) dry, b) after dipping in EtOH, c) after dipping in H<sub>2</sub>O dip. Sputtering time for all samples was 5 min.

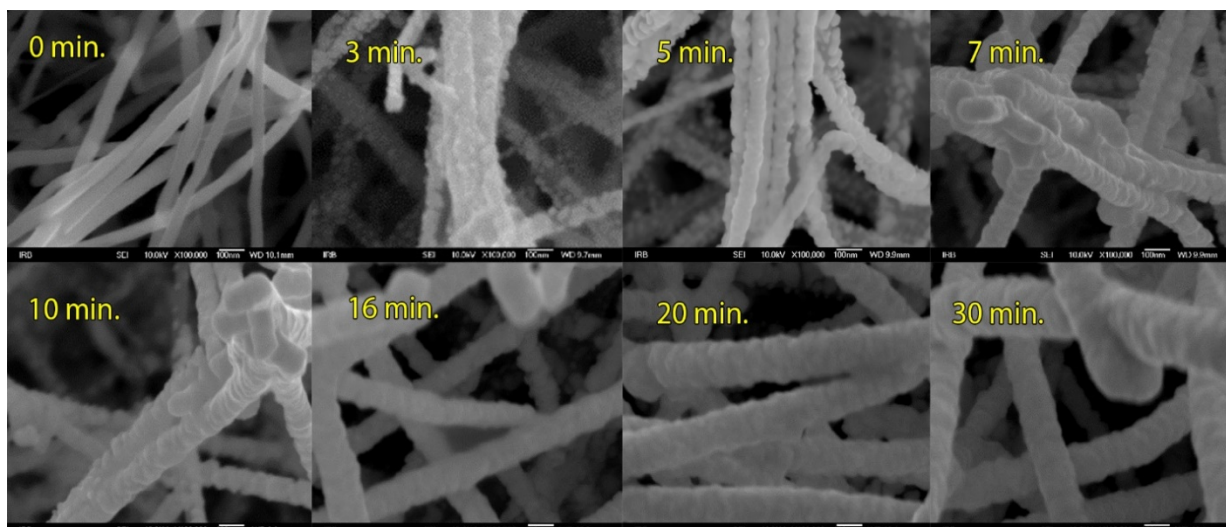

**Figure S11:** SEM images of SiNWs obtained by 500 °C VLS deposition with different Ag-sputtering times, after immersion in liquid. A strong capillary-force influence and SiNW-bundle formation in the samples sputtered for 3–10 min is observed.

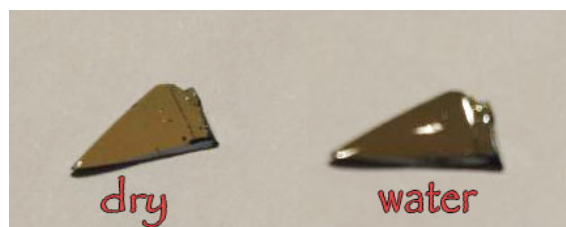

**Figure S12:** Dry and wet (7  $\mu\text{L}$   $\text{H}_2\text{O}$  drop) SiNWs substrate.



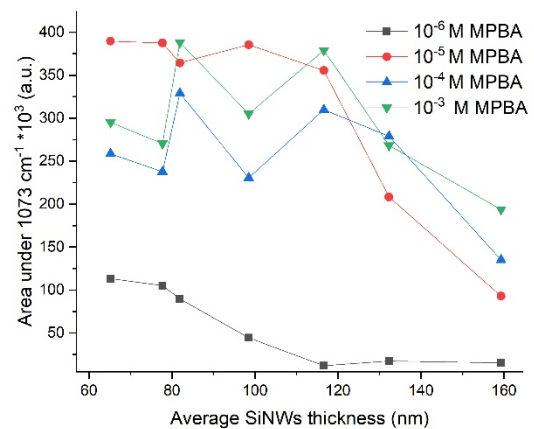

**Figure S13:** Average SERS values for different SiNWs thicknesses for 4-MPBA ethanol solutions.

## SERS sensing of 4-MPBA

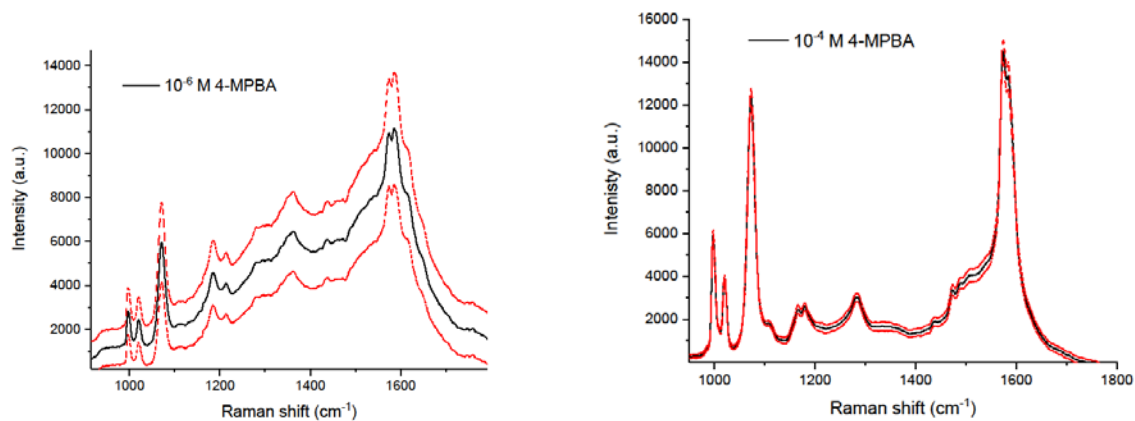

**Figure S14:** SiNW substrate after 5 min of Ag sputtering. 4-MPBA concentration:  $10^{-6}$  M and  $10^{-4}$  M. Mapping standard deviation (red curve) and the average SERS value (black curve). Mapping features: 100 points, 10  $\mu\text{m}$  step, 1 scan/point, 10 s/scan.

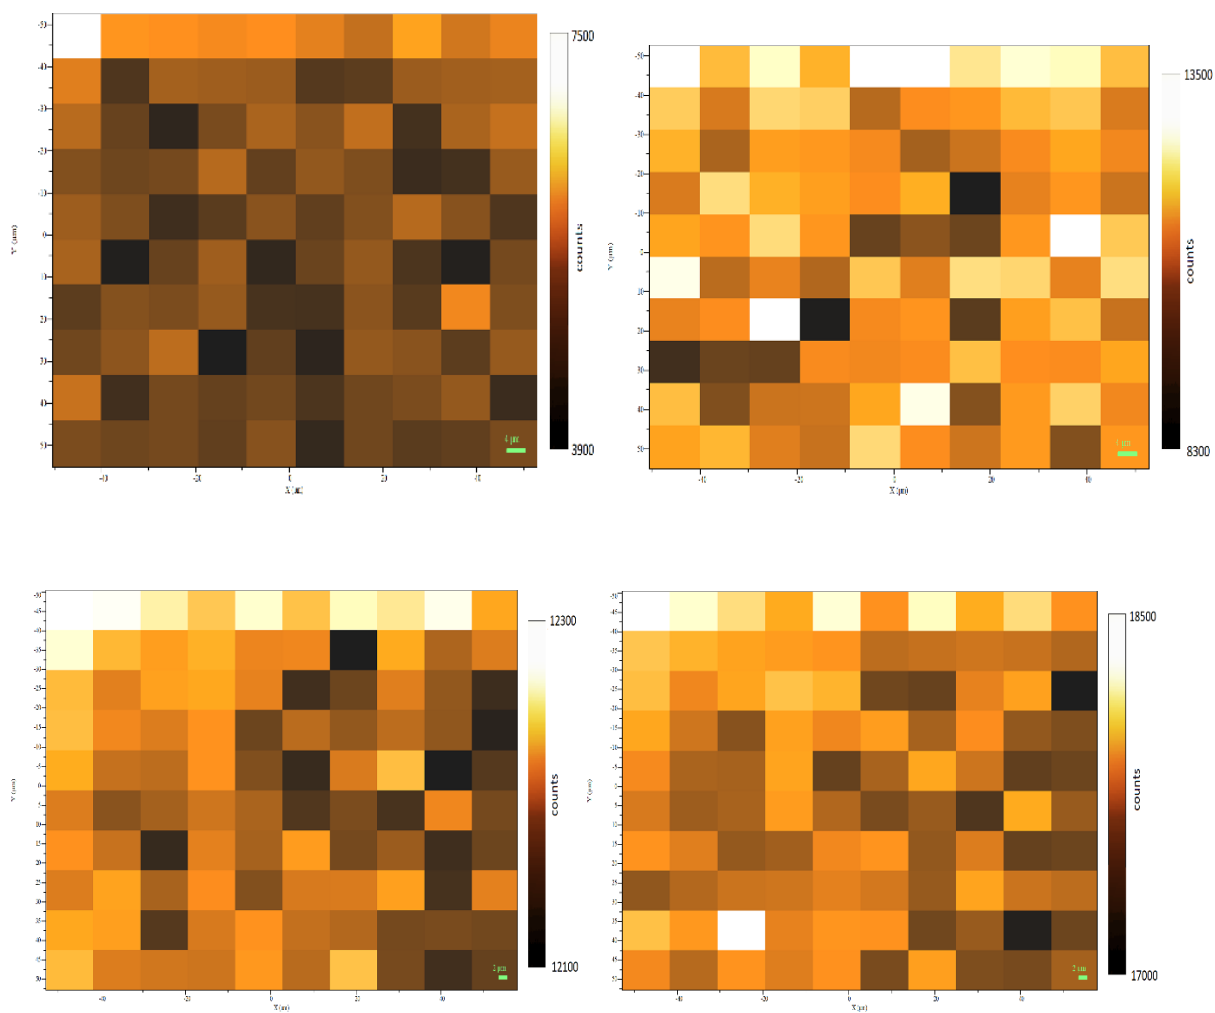

**Figure S15:** SERS mapping: a)  $1075\text{ cm}^{-1}$  band,  $10^{-6}\text{ M}$  MPBA, 5 min Ag-sputtering time, b)  $1574\text{ cm}^{-1}$  band,  $10^{-6}\text{ M}$  MPBA, 5 min Ag-sputtering time, c)  $1075\text{ cm}^{-1}$  band,  $10^{-4}\text{ M}$  MPBA, 3 min Ag-sputtering time, d)  $1574\text{ cm}^{-1}$  band,  $10^{-4}\text{ M}$  MPBA 3 min Ag-sputtering time.

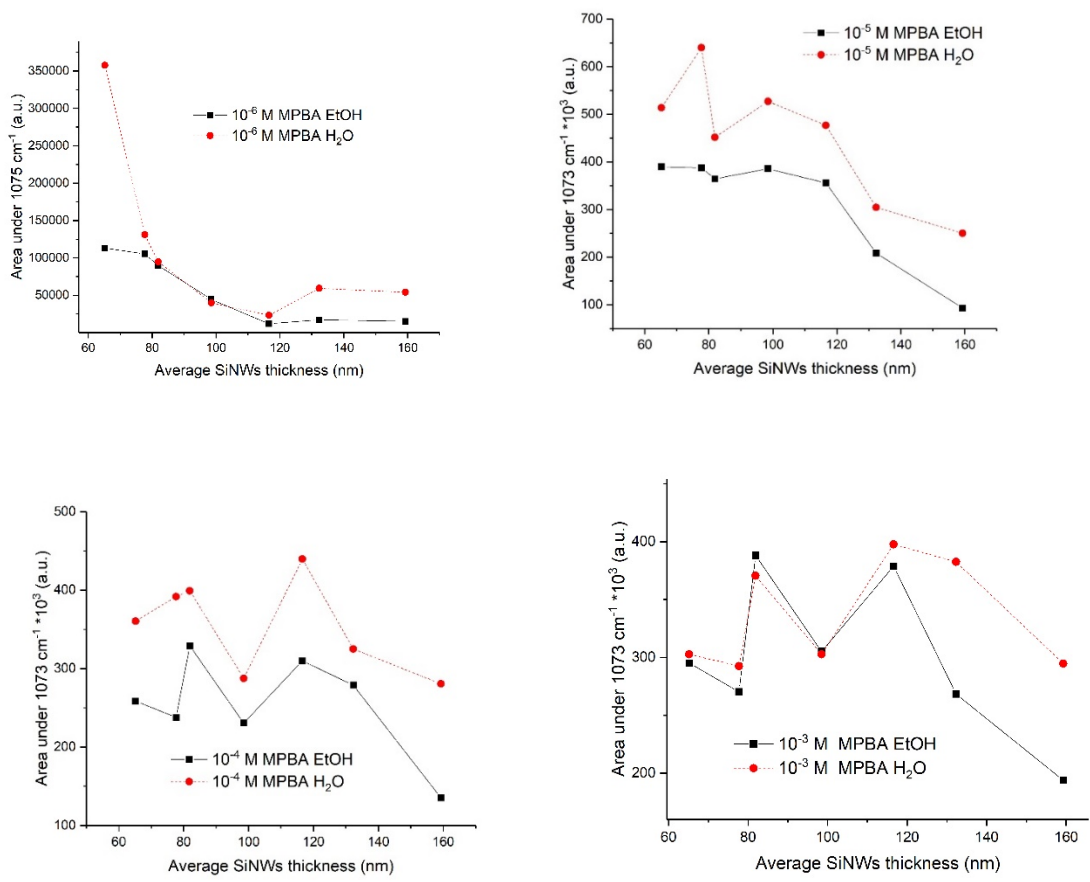

**Figure S16:** Integral SERS spectra intensities under the 1073 cm<sup>-1</sup> band after immersion in EtOH or H<sub>2</sub>O.

## Lacunarity of SiNWs substrates

For the lacunarity calculation, we used ImageJ program utilizing only the same size ( $1875 \times 1410$  pixels or  $8.3 \times 6.2 \mu\text{m}$ ) grey-scale SEM images. The program gave 12 logarithmic spectra as output from which the average value was taken. For example, the spectra for dry samples and different thickness values are shown in Figure S17. On the  $x$ -axis, the  $\varepsilon$  stands for:  $\varepsilon = \varepsilon(\text{px})/\text{SEM-figure dimension (px)}$ , where the “box size” is in pixels (px). The resolution is  $8300 \text{ nm}/1875 \text{ px} = 4.4 \text{ nm/px}$  and therefore the  $532 \text{ nm}$  laser-excitation wavelength corresponds to  $532/4.4 = 120.9 \text{ px}$ . This is the relevant sampling window size. Furthermore, this number should be divided by the SEM image size which is  $1875 \text{ px}$ , i.e.,  $120.9/1875 = 0.064484$  which finally gives  $\ln(0.064484) = -2.74$ . The values at  $-2.74$  in Figure S9 are taken from all spectra for different SiNW thickness values and before and after  $\text{H}_2\text{O}$  immersion.

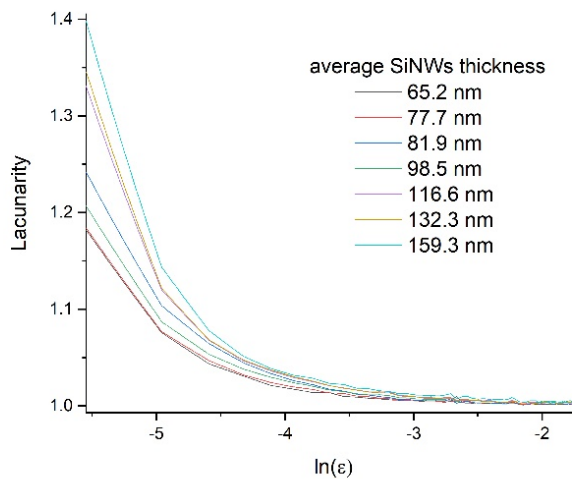

**Figure S17:** Lacunarity of dry SiNWs as a function of  $\varepsilon$ .

## Comparison with commercially available SERS substrates

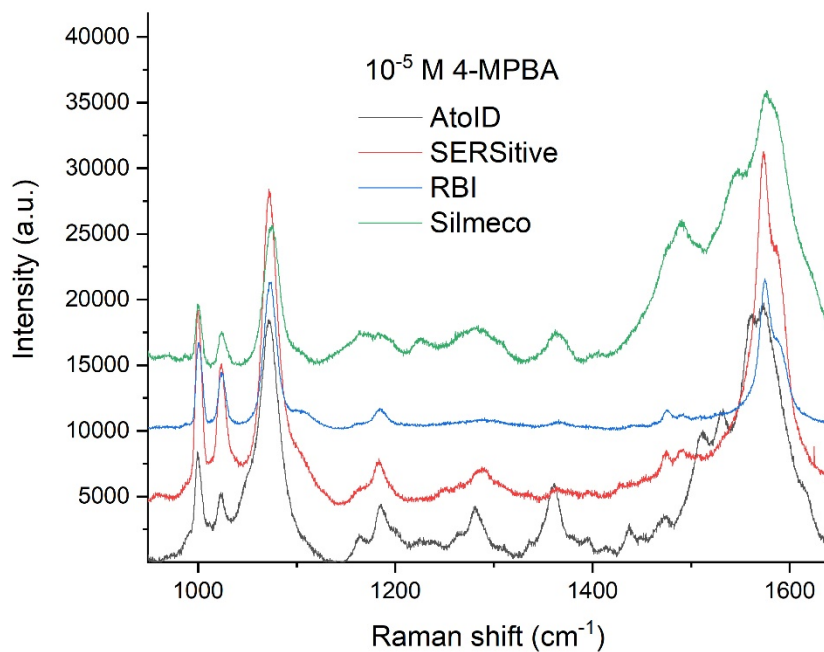

**Figure S18:** Comparison of the commercial SERS substrates and the synthesized sample (RBI) before immersion in water.

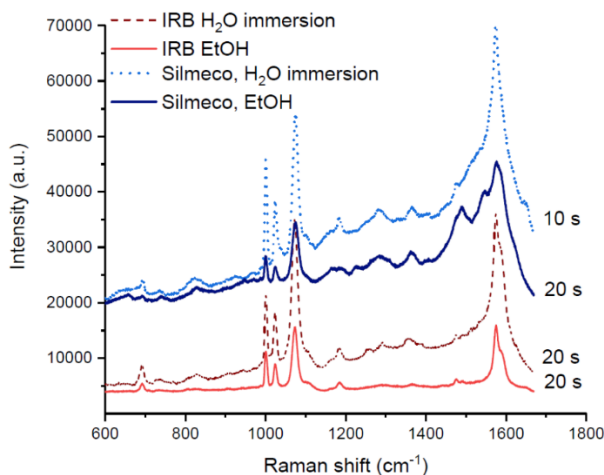

**Figure S19:** Comparison of Silmeco and IRB substrates for  $10^{-5}$  M 4-MPBA.

## References

1. Sun, F.; Ella-Menye, J.-R.; Galvan, D. D.; Bai, T.; Hung, H.-C.; Chou, Y.-N.; Zhang, P.; Jiang, S.; Yu, Q. *ACS Nano* **2015**, *9*, 2668–2676. doi:10.1021/nn506447k
2. Gebavi, H.; Ristić, D.; Baran, N.; Mikac, L.; Mohaček-Grošev, V.; Gotić, M.; Ivanda, M. *Silicon* **2018**, 1–7. doi:10.1007/s12633-018-9906-0
3. Sun, D.; Qi, G.; Xu, S.; Xu, W. *RSC Adv.* **2016**, *6*, 53800–53803. doi:10.1039/C6RA06223G
4. Sun, X.; Stagon, S.; Huang, H.; Chend, J.; Lei, Y. *RSC Adv.* **2014**, *4*, 23382. doi:10.1039/c4ra02423k
5. Xie, D.; Zhu, W. F.; Cheng, H.; Yao, Z. Y.; Li, M.; Zhao, Y. L. *Phys. Chem. Chem. Phys.* **2018**, *20*, 8881–8886. doi:10.1039/c7cp08478a
6. Pham, X.-H.; Shim, S.; Kim, T.-H.; Hahm, E.; Kim, H.-M.; Rho, W.-Y.; Jeong, D. H.; Lee, Y.-S.; Jun, B.-H. *BioChip J.* **2017**, *11*, 46–56. doi:10.1007/s13206-016-1107-6
7. Kiran, V.; Sampath, S. *ACS Appl. Mater. Interfaces* **2012**, *4*, 3818–3828. doi:10.1021/am300349k
8. Su, H.; Wang, Y.; Yu, Z.; Liu, Y.; Zhang, X.; Wang, X.; Sui, H.; Sun, C.; Zhao, B. *Spectrochim. Acta, Part A* **2017**, *185*, 336–342. doi:10.1016/j.saa.2017.05.068
9. Gao, P.; Weaver, M. J. *J. Phys. Chem.* **1985**, *89*, 5040–5046. doi:10.1021/j100269a031
